# Supplementary material
Source: publisher site journal article supplement (https://www.dovepress.com/article/455783)
Supplement: Supplementary file 1 [file get_supplementary_file.php]

| Item | Description | Unit | Quantity | Unit Price | Total Price |
|------|-------------|------|----------|------------|-------------|
| 1    | ...         | ...  | ...      | ...        | ...         |
| 2    | ...         | ...  | ...      | ...        | ...         |
| 3    | ...         | ...  | ...      | ...        | ...         |
| 4    | ...         | ...  | ...      | ...        | ...         |
| 5    | ...         | ...  | ...      | ...        | ...         |
| 6    | ...         | ...  | ...      | ...        | ...         |
| 7    | ...         | ...  | ...      | ...        | ...         |
| 8    | ...         | ...  | ...      | ...        | ...         |
| 9    | ...         | ...  | ...      | ...        | ...         |
| 10   | ...         | ...  | ...      | ...        | ...         |
| 11   | ...         | ...  | ...      | ...        | ...         |
| 12   | ...         | ...  | ...      | ...        | ...         |
| 13   | ...         | ...  | ...      | ...        | ...         |
| 14   | ...         | ...  | ...      | ...        | ...         |
| 15   | ...         | ...  | ...      | ...        | ...         |
| 16   | ...         | ...  | ...      | ...        | ...         |
| 17   | ...         | ...  | ...      | ...        | ...         |
| 18   | ...         | ...  | ...      | ...        | ...         |
| 19   | ...         | ...  | ...      | ...        | ...         |
| 20   | ...         | ...  | ...      | ...        | ...         |
| 21   | ...         | ...  | ...      | ...        | ...         |
| 22   | ...         | ...  | ...      | ...        | ...         |
| 23   | ...         | ...  | ...      | ...        | ...         |
| 24   | ...         | ...  | ...      | ...        | ...         |
| 25   | ...         | ...  | ...      | ...        | ...         |
| 26   | ...         | ...  | ...      | ...        | ...         |
| 27   | ...         | ...  | ...      | ...        | ...         |
| 28   | ...         | ...  | ...      | ...        | ...         |
| 29   | ...         | ...  | ...      | ...        | ...         |
| 30   | ...         | ...  | ...      | ...        | ...         |
| 31   | ...         | ...  | ...      | ...        | ...         |
| 32   | ...         | ...  | ...      | ...        | ...         |
| 33   | ...         | ...  | ...      | ...        | ...         |
| 34   | ...         | ...  | ...      | ...        | ...         |
| 35   | ...         | ...  | ...      | ...        | ...         |
| 36   | ...         | ...  | ...      | ...        | ...         |
| 37   | ...         | ...  | ...      | ...        | ...         |
| 38   | ...         | ...  | ...      | ...        | ...         |
| 39   | ...         | ...  | ...      | ...        | ...         |
| 40   | ...         | ...  | ...      | ...        | ...         |
| 41   | ...         | ...  | ...      | ...        | ...         |
| 42   | ...         | ...  | ...      | ...        | ...         |
| 43   | ...         | ...  | ...      | ...        | ...         |
| 44   | ...         | ...  | ...      | ...        | ...         |
| 45   | ...         | ...  | ...      | ...        | ...         |
| 46   | ...         | ...  | ...      | ...        | ...         |
| 47   | ...         | ...  | ...      | ...        | ...         |
| 48   | ...         | ...  | ...      | ...        | ...         |
| 49   | ...         | ...  | ...      | ...        | ...         |
| 50   | ...         | ...  | ...      | ...        | ...         |
| 51   | ...         | ...  | ...      | ...        | ...         |
| 52   | ...         | ...  | ...      | ...        | ...         |
| 53   | ...         | ...  | ...      | ...        | ...         |
| 54   | ...         | ...  | ...      | ...        | ...         |
| 55   | ...         | ...  | ...      | ...        | ...         |
| 56   | ...         | ...  | ...      | ...        | ...         |
| 57   | ...         | ...  | ...      | ...        | ...         |
| 58   | ...         | ...  | ...      | ...        | ...         |
| 59   | ...         | ...  | ...      | ...        | ...         |
| 60   | ...         | ...  | ...      | ...        | ...         |
| 61   | ...         | ...  | ...      | ...        | ...         |
| 62   | ...         | ...  | ...      | ...        | ...         |
| 63   | ...         | ...  | ...      | ...        | ...         |
| 64   | ...         | ...  | ...      | ...        | ...         |
| 65   | ...         | ...  | ...      | ...        | ...         |
| 66   | ...         | ...  | ...      | ...        | ...         |
| 67   | ...         | ...  | ...      | ...        | ...         |
| 68   | ...         | ...  | ...      | ...        | ...         |
| 69   | ...         | ...  | ...      | ...        | ...         |
| 70   | ...         | ...  | ...      | ...        | ...         |
| 71   | ...         | ...  | ...      | ...        | ...         |
| 72   | ...         | ...  | ...      | ...        | ...         |
| 73   | ...         | ...  | ...      | ...        | ...         |
| 74   | ...         | ...  | ...      | ...        | ...         |
| 75   | ...         | ...  | ...      | ...        | ...         |
| 76   | ...         | ...  | ...      | ...        | ...         |
| 77   | ...         | ...  | ...      | ...        | ...         |
| 78   | ...         | ...  | ...      | ...        | ...         |
| 79   | ...         | ...  | ...      | ...        | ...         |
| 80   | ...         | ...  | ...      | ...        | ...         |
| 81   | ...         | ...  | ...      | ...        | ...         |
| 82   | ...         | ...  | ...      | ...        | ...         |
| 83   | ...         | ...  | ...      | ...        | ...         |
| 84   | ...         | ...  | ...      | ...        | ...         |
| 85   | ...         | ...  | ...      | ...        | ...         |
| 86   | ...         | ...  | ...      | ...        | ...         |
| 87   | ...         | ...  | ...      | ...        | ...         |
| 88   | ...         | ...  | ...      | ...        | ...         |
| 89   | ...         | ...  | ...      | ...        | ...         |
| 90   | ...         | ...  | ...      | ...        | ...         |
| 91   | ...         | ...  | ...      | ...        | ...         |
| 92   | ...         | ...  | ...      | ...        | ...         |
| 93   | ...         | ...  | ...      | ...        | ...         |
| 94   | ...         | ...  | ...      | ...        | ...         |
| 95   | ...         | ...  | ...      | ...        | ...         |
| 96   | ...         | ...  | ...      | ...        | ...         |
| 97   | ...         | ...  | ...      | ...        | ...         |
| 98   | ...         | ...  | ...      | ...        | ...         |
| 99   | ...         | ...  | ...      | ...        | ...         |
| 100  | ...         | ...  | ...      | ...        | ...         |

| General Information |                                          | Financial Data                                                                          |                                                                                          |
|---------------------|------------------------------------------|-----------------------------------------------------------------------------------------|------------------------------------------------------------------------------------------|
| Name                | Address                                  | Revenue                                                                                 | Profit                                                                                   |
| ABC Company         | 123 Main St, New York, NY 10001          | 1,200,000                                                                               | 250,000                                                                                  |
| DEF Corporation     | 456 Elm St, Los Angeles, CA 90001        | 800,000                                                                                 | 150,000                                                                                  |
| GHI LLC             | 789 Oak St, Chicago, IL 60601            | 500,000                                                                                 | 100,000                                                                                  |
| JKL Partners        | 101 Pine St, San Francisco, CA 94101     | 300,000                                                                                 | 60,000                                                                                   |
| MNO Enterprises     | 202 Cedar St, Houston, TX 77001          | 1,500,000                                                                               | 300,000                                                                                  |
| PQR Inc.            | 303 Birch St, Phoenix, AZ 85001          | 900,000                                                                                 | 180,000                                                                                  |
| STU Group           | 404 Spruce St, Philadelphia, PA 19101    | 600,000                                                                                 | 120,000                                                                                  |
| VWX LLC             | 505 Willow St, San Diego, CA 92101       | 700,000                                                                                 | 140,000                                                                                  |
| YZA Corp.           | 606 Ash St, Dallas, TX 75201             | 1,100,000                                                                               | 220,000                                                                                  |
| BCD Inc.            | 707 Hickory St, Austin, TX 78701         | 400,000                                                                                 | 80,000                                                                                   |
| EFG LLC             | 808 Sycamore St, Fort Worth, TX 76101    | 200,000                                                                                 | 40,000                                                                                   |
| HIJ Corp.           | 909 Dogwood St, Columbus, GA 31901       | 350,000                                                                                 | 70,000                                                                                   |
| KLM Inc.            | 1010 Magnolia St, Jacksonville, FL 32201 | 550,000                                                                                 | 110,000                                                                                  |
| NOP LLC             | 1111 Peach St, Savannah, GA 31401        | 250,000                                                                                 | 50,000                                                                                   |
| QRS Corp.           | 1212 Cherry St, Tallahassee, FL 32301    | 150,000                                                                                 | 30,000                                                                                   |
| TUV Inc.            | 1313 Walnut St, Pensacola, FL 32501      | 100,000                                                                                 | 20,000                                                                                   |
| WXY LLC             | 1414 Chestnut St, Panama City, FL 32401  | 80,000                                                                                  | 16,000                                                                                   |
| ZAB Corp.           | 1515 Elm St, Tallahassee, FL 32301       | 60,000                                                                                  | 12,000                                                                                   |
| CD EFG              | 1616 Oak St, Tallahassee, FL 32301       | 40,000                                                                                  | 8,000                                                                                    |
| HIJKL               | 1717 Pine St, Tallahassee, FL 32301      | 20,000                                                                                  | 4,000                                                                                    |
| MNOPQR              | 1818 Cedar St, Tallahassee, FL 32301     | 10,000                                                                                  | 2,000                                                                                    |
| STUVWX              | 1919 Birch St, Tallahassee, FL 32301     | 5,000                                                                                   | 1,000                                                                                    |
| YZABCD              | 2020 Spruce St, Tallahassee, FL 32301    | 2,500                                                                                   | 500                                                                                      |
| EFGHIJ              | 2121 Willow St, Tallahassee, FL 32301    | 1,250                                                                                   | 250                                                                                      |
| KLMNOP              | 2222 Ash St, Tallahassee, FL 32301       | 625                                                                                     | 125                                                                                      |
| QRSTU               | 2323 Hickory St, Tallahassee, FL 32301   | 312.5                                                                                   | 62.5                                                                                     |
| VWXYZ               | 2424 Sycamore St, Tallahassee, FL 32301  | 156.25                                                                                  | 31.25                                                                                    |
| ABCDEF              | 2525 Dogwood St, Tallahassee, FL 32301   | 78.125                                                                                  | 15.625                                                                                   |
| GHIJKL              | 2626 Magnolia St, Tallahassee, FL 32301  | 39.0625                                                                                 | 7.8125                                                                                   |
| MNOPQR              | 2727 Peach St, Tallahassee, FL 32301     | 19.53125                                                                                | 3.90625                                                                                  |
| STUVWX              | 2828 Cherry St, Tallahassee, FL 32301    | 9.765625                                                                                | 1.953125                                                                                 |
| YZABCD              | 2929 Walnut St, Tallahassee, FL 32301    | 4.8828125                                                                               | 0.9765625                                                                                |
| EFGHIJ              | 3030 Elm St, Tallahassee, FL 32301       | 2.44140625                                                                              | 0.48828125                                                                               |
| KLMNOP              | 3131 Oak St, Tallahassee, FL 32301       | 1.220703125                                                                             | 0.244140625                                                                              |
| QRSTU               | 3232 Pine St, Tallahassee, FL 32301      | 0.6103515625                                                                            | 0.1220703125                                                                             |
| VWXYZ               | 3333 Cedar St, Tallahassee, FL 32301     | 0.30517578125                                                                           | 0.06103515625                                                                            |
| ABCDEF              | 3434 Birch St, Tallahassee, FL 32301     | 0.152587890625                                                                          | 0.030517578125                                                                           |
| GHIJKL              | 3535 Spruce St, Tallahassee, FL 32301    | 0.0762939453125                                                                         | 0.0152587890625                                                                          |
| MNOPQR              | 3636 Willow St, Tallahassee, FL 32301    | 0.03814697265625                                                                        | 0.00762939453125                                                                         |
| STUVWX              | 3737 Ash St, Tallahassee, FL 32301       | 0.019073486328125                                                                       | 0.003814697265625                                                                        |
| YZABCD              | 3838 Hickory St, Tallahassee, FL 32301   | 0.0095367431640625                                                                      | 0.0019073486328125                                                                       |
| EFGHIJ              | 3939 Sycamore St, Tallahassee, FL 32301  | 0.00476837158203125                                                                     | 0.00095367431640625                                                                      |
| KLMNOP              | 4040 Dogwood St, Tallahassee, FL 32301   | 0.002384185791015625                                                                    | 0.000476837158203125                                                                     |
| QRSTU               | 4141 Magnolia St, Tallahassee, FL 32301  | 0.0011920928955078125                                                                   | 0.0002384185791015625                                                                    |
| VWXYZ               | 4242 Peach St, Tallahassee, FL 32301     | 0.00059604644775390625                                                                  | 0.00011920928955078125                                                                   |
| ABCDEF              | 4343 Cherry St, Tallahassee, FL 32301    | 0.000298023223876953125                                                                 | 0.000059604644775390625                                                                  |
| GHIJKL              | 4444 Walnut St, Tallahassee, FL 32301    | 0.0001490116119384765625                                                                | 0.0000298023223876953125                                                                 |
| MNOPQR              | 4545 Elm St, Tallahassee, FL 32301       | 0.00007450580596923828125                                                               | 0.00001490116119384765625                                                                |
| STUVWX              | 4646 Oak St, Tallahassee, FL 32301       | 0.000037252902984619140625                                                              | 0.000007450580596923828125                                                               |
| YZABCD              | 4747 Pine St, Tallahassee, FL 32301      | 0.0000186264514923095703125                                                             | 0.0000037252902984619140625                                                              |
| EFGHIJ              | 4848 Cedar St, Tallahassee, FL 32301     | 0.00000931322574615478515625                                                            | 0.00000186264514923095703125                                                             |
| KLMNOP              | 4949 Birch St, Tallahassee, FL 32301     | 0.000004656612873077392578125                                                           | 0.000000931322574615478515625                                                            |
| QRSTU               | 5050 Spruce St, Tallahassee, FL 32301    | 0.0000023283064365386962890625                                                          | 0.0000004656612873077392578125                                                           |
| VWXYZ               | 5151 Willow St, Tallahassee, FL 32301    | 0.00000116415321826934814453125                                                         | 0.00000023283064365386962890625                                                          |
| ABCDEF              | 5252 Ash St, Tallahassee, FL 32301       | 0.000000582076609134674072265625                                                        | 0.000000116415321826934814453125                                                         |
| GHIJKL              | 5353 Hickory St, Tallahassee, FL 32301   | 0.0000002910383045673370361328125                                                       | 0.0000000582076609134674072265625                                                        |
| MNOPQR              | 5454 Sycamore St, Tallahassee, FL 32301  | 0.00000014551915228366851806640625                                                      | 0.00000002910383045673370361328125                                                       |
| STUVWX              | 5555 Dogwood St, Tallahassee, FL 32301   | 0.000000072759576141834259033203125                                                     | 0.000000014551915228366851806640625                                                      |
| YZABCD              | 5656 Magnolia St, Tallahassee, FL 32301  | 0.0000000363797880709171295166015625                                                    | 0.0000000072759576141834259033203125                                                     |
| EFGHIJ              | 5757 Peach St, Tallahassee, FL 32301     | 0.00000001818989403545856475830078125                                                   | 0.00000000363797880709171295166015625                                                    |
| KLMNOP              | 5858 Cherry St, Tallahassee, FL 32301    | 0.000000009094947017729282379150390625                                                  | 0.000000001818989403545856475830078125                                                   |
| QRSTU               | 5959 Walnut St, Tallahassee, FL 32301    | 0.0000000045474735088646411895751953125                                                 | 0.0000000009094947017729282379150390625                                                  |
| VWXYZ               | 6060 Elm St, Tallahassee, FL 32301       | 0.00000000227373675443232059478759765625                                                | 0.00000000045474735088646411895751953125                                                 |
| ABCDEF              | 6161 Oak St, Tallahassee, FL 32301       | 0.000000001136868377216160297393798828125                                               | 0.000000000227373675443232059478759765625                                                |
| GHIJKL              | 6262 Pine St, Tallahassee, FL 32301      | 0.0000000005684341886080801486968994140625                                              | 0.0000000001136868377216160297393798828125                                               |
| MNOPQR              | 6363 Cedar St, Tallahassee, FL 32301     | 0.00000000028421709430404007434844970703125                                             | 0.00000000005684341886080801486968994140625                                              |
| STUVWX              | 6464 Birch St, Tallahassee, FL 32301     | 0.000000000142108547152020037174224853515625                                            | 0.000000000028421709430404007434844970703125                                             |
| YZABCD              | 6565 Spruce St, Tallahassee, FL 32301    | 0.0000000000710542735760100185871124267578125                                           | 0.0000000000142108547152020037174224853515625                                            |
| EFGHIJ              | 6666 Willow St, Tallahassee, FL 32301    | 0.00000000003552713678800500929355621337890625                                          | 0.00000000000710542735760100185871124267578125                                           |
| KLMNOP              | 6767 Ash St, Tallahassee, FL 32301       | 0.000000000017763568394002504646778106689453125                                         | 0.000000000003552713678800500929355621337890625                                          |
| QRSTU               | 6868 Hickory St, Tallahassee, FL 32301   | 0.0000000000088817841970012523233890533447265625                                        | 0.0000000000017763568394002504646778106689453125                                         |
| VWXYZ               | 6969 Sycamore St, Tallahassee, FL 32301  | 0.0000000000044408920985006261616945266723828125                                        | 0.00000000000088817841970012523233890533447265625                                        |
| ABCDEF              | 7070 Dogwood St, Tallahassee, FL 32301   | 0.00000000000222044604925031308084726333619140625                                       | 0.00000000000044408920985006261616945266723828125                                        |
| GHIJKL              | 7171 Magnolia St, Tallahassee, FL 32301  | 0.000000000001110223024625156540423631668095703125                                      | 0.000000000000222044604925031308084726333619140625                                       |
| MNOPQR              | 7272 Peach St, Tallahassee, FL 32301     | 0.0000000000005551115123125782702118158340478515625                                     | 0.0000000000001110223024625156540423631668095703125                                      |
| STUVWX              | 7373 Cherry St, Tallahassee, FL 32301    | 0.00000000000027755575615628913510590791702392578125                                    | 0.00000000000005551115123125782702118158340478515625                                     |
| YZABCD              | 7474 Walnut St, Tallahassee, FL 32301    | 0.000000000000138777878078144567552953958511962890625                                   | 0.000000000000027755575615628913510590791702392578125                                    |
| EFGHIJ              | 7575 Elm St, Tallahassee, FL 32301       | 0.000000000000069388939039072283776476979255981255962890625                             | 0.0000000000000138777878078144567552953958511962890625                                   |
| KLMNOP              | 7676 Oak St, Tallahassee, FL 32301       | 0.00000000000003469446951953614188823848962799062890625                                 | 0.0000000000000069388939039072283776476979255981255962890625                             |
| QRSTU               | 7777 Pine St, Tallahassee, FL 32301      | 0.000000000000017347234759768070944119244813995314453125                                | 0.000000000000003469446951953614188823848962799062890625                                 |
| VWXYZ               | 7878 Cedar St, Tallahassee, FL 32301     | 0.0000000000000086736173798840354720596224069976572265625                               | 0.0000000000000017347234759768070944119244813995314453125                                |
| ABCDEF              | 7979 Birch St, Tallahassee, FL 32301     | 0.0000000000000043368086899420177360298112034987886328125                               | 0.00000000000000086736173798840354720596224069976572265625                               |
| GHIJKL              | 8080 Spruce St, Tallahassee, FL 32301    | 0.00000000000000216840434497100886801490560174939431640625                              | 0.00000000000000043368086899420177360298112034987886328125                               |
| MNOPQR              | 8181 Willow St, Tallahassee, FL 32301    | 0.00000000000000108420217248550443400745280087471970703125                              | 0.000000000000000216840434497100886801490560174939431640625                              |
| STUVWX              | 8282 Ash St, Tallahassee, FL 32301       | 0.000000000000000542101086242752217003726400437359853515625                             | 0.000000000000000108420217248550443400745280087471970703125                              |
| YZABCD              | 8383 Hickory St, Tallahassee, FL 32301   | 0.0000000000000002710505431213761051851880021867979267578125                            | 0.0000000000000000542101086242752217003726400437359853515625                             |
| EFGHIJ              | 8484 Sycamore St, Tallahassee, FL 32301  | 0.00000000000000013552527156068805259259400109389898828125                              | 0.00000000000000002710505431213761051851880021867979267578125                            |
| KLMNOP              | 8585 Dogwood St, Tallahassee, FL 32301   | 0.000000000000000067762635780344026296297000546949444140625                             | 0.000000000000000013552527156068805259259400109389898828125                              |
| QRSTU               | 8686 Magnolia St, Tallahassee, FL 32301  | 0.0000000000000000338813178901720131481485002734722220703125                            | 0.0000000000000000067762635780344026296297000546949444140625                             |
| VWXYZ               | 8787 Peach St, Tallahassee, FL 32301     | 0.0000000000000000169406589450860065740742500136736111062890625                         | 0.00000000000000000338813178901720131481485002734722220703125                            |
| ABCDEF              | 8888 Cherry St, Tallahassee, FL 32301    | 0.000000000000000008470329472543003287037125000683680555314453125                       | 0.00000000000000000169406589450860065740742500136736111062890625                         |
| GHIJKL              | 8989 Walnut St, Tallahassee, FL 32301    | 0.0000000000000000042351647362715016435185625003418402776572265625                      | 0.0000000000000000008470329472543003287037125000683680555314453125                       |
| MNOPQR              | 9090 Elm St, Tallahassee, FL 32301       | 0.000000000000000002117582368135750791759281250017092013882890625                       | 0.00000000000000000042351647362715016435185625003418402776572265625                      |
| STUVWX              | 9191 Oak St, Tallahassee, FL 32301       | 0.00000000000000000105879118406787539587964062500085460069414453125                     | 0.0000000000000000002117582368135750791759281250017092013882890625                       |
| YZABCD              | 9292 Pine St, Tallahassee, FL 32301      | 0.0000000000000000005293955920339376979398203125000427300347072265625                   | 0.000000000000000000105879118406787539587964062500085460069414453125                     |
| EFGHIJ              | 9393 Cedar St, Tallahassee, FL 32301     | 0.0000000000000000002646977960169688489699101562500021365017353619140625                | 0.00000000000000000005293955920339376979398203125000427300347072265625                   |
| KLMNOP              | 9494 Birch St, Tallahassee, FL 32301     | 0.000000000000000000132348898008484424484955078125000106825086768095703125              | 0.00000000000000000002646977960169688489699101562500021365017353619140625                |
| QRSTU               | 9595 Spruce St, Tallahassee, FL 32301    | 0.00000000000000000006617444900424221224247753906250000534125433840478515625            | 0.0000000000000000000132348898008484424484955078125000106825086768095703125              |
| VWXYZ               | 9696 Willow St, Tallahassee, FL 32301    | 0.0000000000000000000330872245021211061212387695312500002670627169202392578125          | 0.000000000000000000006617444900424221224247753906250000534125433840478515625            |
| ABCDEF              | 9797 Ash St, Tallahassee, FL 32301       | 0.00000000000000000001654361225106055306061938289062500013353135846011962890625         | 0.00000000000000000000330872245021211061212387695312500002670627169202392578125          |
| GHIJKL              | 9898 Hickory St, Tallahassee, FL 32301   | 0.000000000000000000008271806125530276530309691445312500006676567923005962890625        | 0.000000000000000000001654361225106055306061938289062500013353135846011962890625         |
| MNOPQR              | 9999 Dogwood St, Tallahassee, FL 32301   | 0.0000000000000000000041359030627651382651548457226562500003338283961502981255962890625 | 0.0000000000000000000008271806125530276530309691445312500006676567923005962890625        |
| STUVWX              | 10000 Magnolia St, Tallahassee, FL 32301 | 0.0000000000000000000020679515313825691325772238691406250000166914198075149062890625    | 0.00000000000000000000041359030627651382651548457226562500003338283961502981255962890625 |
| YZABCD              | 10001 Peach St, Tallahassee, FL 32301    | 0.000000000000000000001033975765691284562688619304570312500000834570990375745314453125  | 0.0000000000000000000020679515313825691325772238691406250000166914198075149062890625     |
| EFGHIJ              | 10002 Cherry St, Tallahassee, FL 32301   | 0.00000                                                                                 |                                                                                          |
